# Supplementary material
Source: PubMed Central journal article supplement (PMC3637753)
Supplement: 1220751110_pnas.201220751SI.pdf [file 1220751110_pnas.201220751SI.pdf]

# Supporting Information

Saha et al. 10.1073/pnas.1220751110

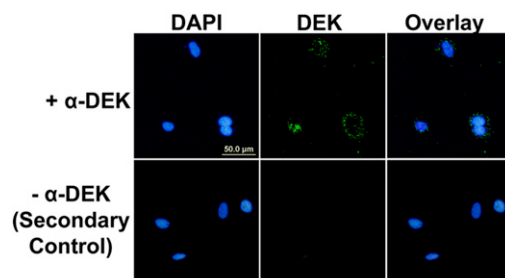

**Fig. S1.** Secondary antibody controls for (DEK)-positive foci show no nonspecific staining. HeLa cells incubated with recombinant histidine (His)-DEK for 1 h at 37 °C were subsequently fixed and subjected to treatment with or without a monoclonal  $\alpha$ -DEK antibody. Cells were then stained with a FITC-conjugated goat anti-mouse antibody (Molecular Probes/Invitrogen) and visualized by laser-scanning confocal microscopy (Olympus FV-500).

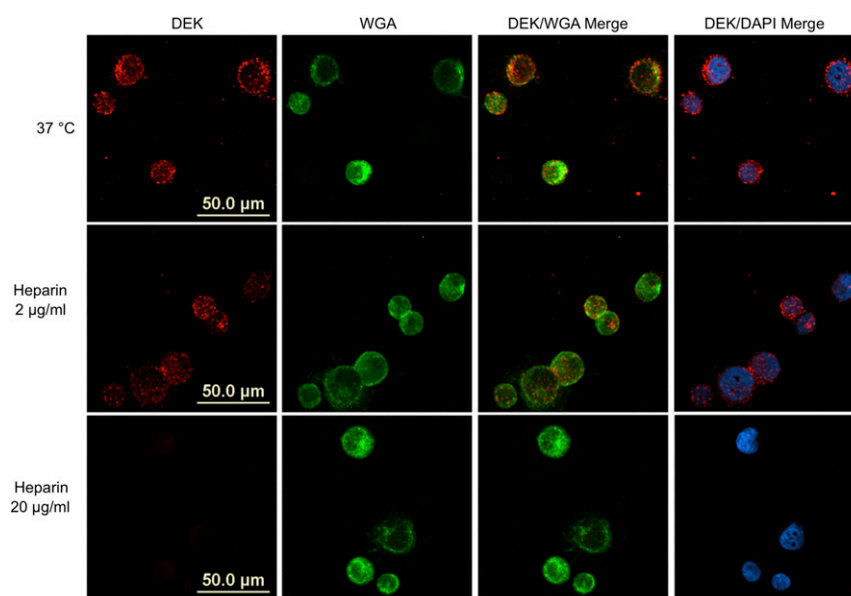

**Fig. S2.** Soluble heparin inhibits DEK internalization in a dose-dependent fashion. HeLa DEK-knockdown (DEK-KD) cells were left untreated or were pre-treated with either 2  $\mu$ g/mL or 20  $\mu$ g/mL soluble heparin. Cells were washed and then incubated with recombinant His-DEK and either PBS or 2  $\mu$ g/mL or 20  $\mu$ g/mL soluble heparin at 37 °C. Cells were stained with wheat germ agglutinin (WGA; green), a monoclonal DEK antibody (red), and DAPI (blue). Images were obtained by confocal microscopy.



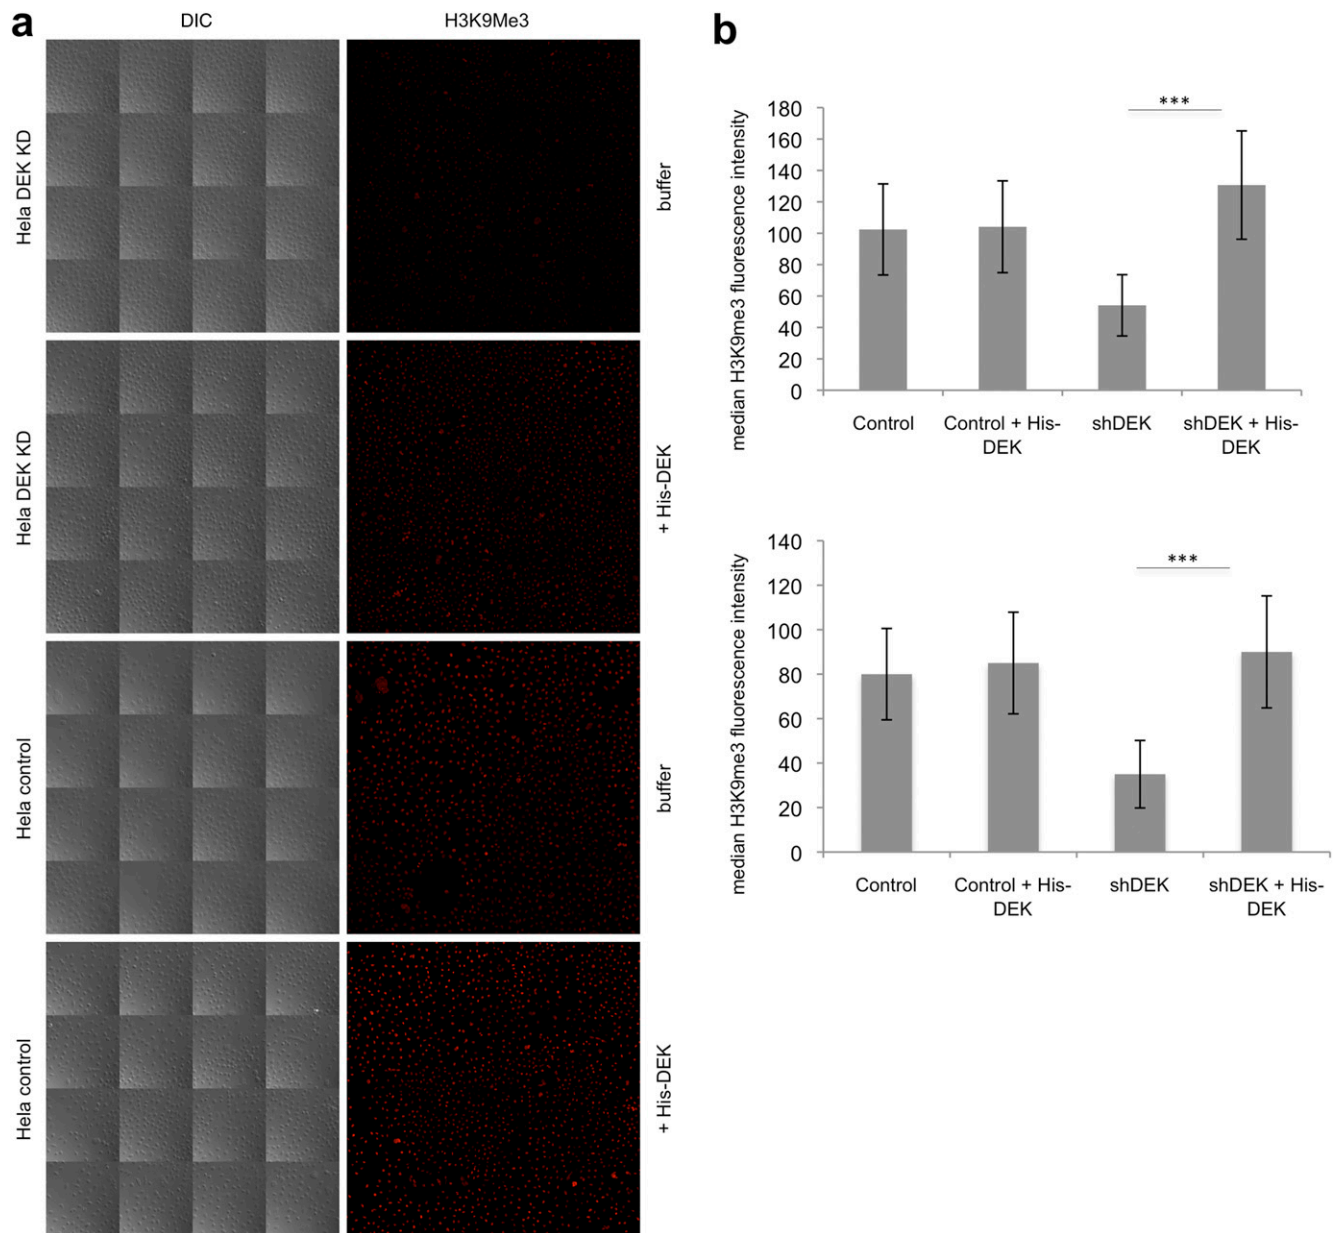

**Fig. 54.** Representative tile scans used for Histone H3 tri-methylated at lysine 9 (H3K9Me3) intensity analysis with KNIME. (A) Tile scans for a representative biological replicate. Differential interference contrast (DIC) images and H3K9Me3 intensities are depicted for DEK-KD and control cells, either untreated or treated with His-DEK for 48 h. (B) Analysis of H3K9Me3 intensities using KNIME as shown in Fig. 4C. Shown is the analysis of two additional biological replicates, performed on two separate occasions. \*\*\* $P = 0.001$  in both experiments.

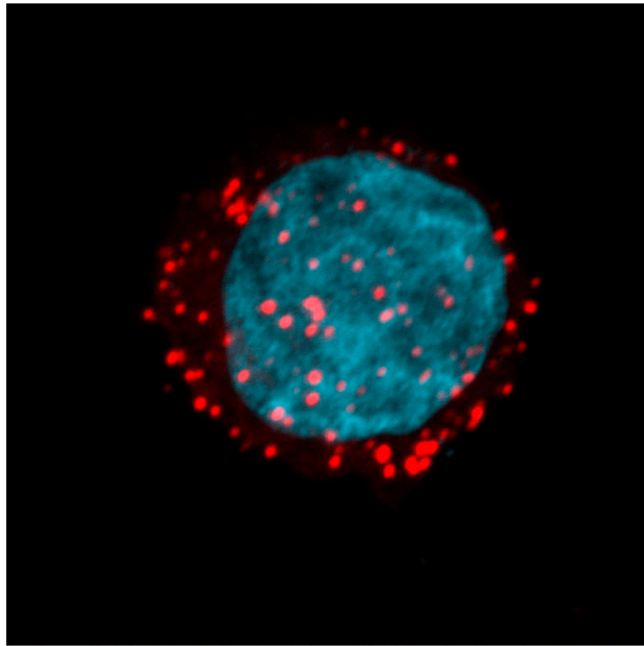

**Movie S1.** A 3D representation of DEK internalization. Stacks of z-slices were compiled into a video of HeLa DEK-KD S3 cells incubated with His-tagged recombinant DEK ( $20 \mu\text{g}/1 \times 10^7$  cells) for 2 h and stained with DAPI (blue) and a monoclonal DEK antibody (red).

[Movie S1](#)
